1 Psychological impact of Covid-19 lockdown in India: Different strokes for different folks

2

3

Anupam Joya Sharma<sup>1\*</sup>

4

Malavika A. Subramanyam<sup>1</sup>

5

6

7

8

9

10

11

12

13

14

15

16

17

18

19

20

21 <sup>1</sup> Social Epidemiology, Indian Institute of Technology Gandhinagar, India

22 \* Corresponding author

23 Email: [Anupam.sharma@iitgn.ac.in](mailto:Anupam.sharma@iitgn.ac.in)

24 Ph: +919265058908

25

26

27

28

29

30

31 **Abstract**

32 The psychological impact of the lockdown due to the Covid-19 pandemic are widely  
33 documented. In India, a family-centric society with a high population density and extreme  
34 social stratification, the impact of the lockdown might vary across diverse social groups.  
35 However, the patterning in the psychological impact of the lockdown among sexual  
36 minorities and persons known to be at higher risk of contracting Covid-19 is not known in the  
37 Indian context. We used mixed methods (online survey, n=282 and in-depth interviews,  
38 n=14) to investigate whether the psychological impact of the lockdown was different across  
39 these groups of Indian adults. We fitted linear and logistic regression models adjusted for  
40 sociodemographic covariates. Thematic analysis helped us identify emergent themes in our  
41 qualitative narratives. Anxiety was found to be higher among sexual minorities ( $\beta=2.44$ , CI:  
42 0.58, 4.31), high-risk group ( $\beta=2.20$ , CI:0.36, 4.05), and those with history of  
43 depression/loneliness ( $\beta=3.89$ , CI:2.34, 5.44). Addiction to pornography was also found to be  
44 higher among sexual minorities ( $\beta=2.72$ , CI: 0.09, 5.36). Qualitative findings suggested that  
45 sexual minorities likely used pornography and masturbation to cope with the lockdown, given  
46 the limited physical access to sexual partners in a society that stigmatizes homosexuality.  
47 Moreover, both qualitative and quantitative study findings suggested that greater frequency of  
48 calling family members during lockdown could strengthen social relationships and increase  
49 social empathy. The study thereby urgently calls for the attention of policymakers to take  
50 sensitive and inclusive health decisions for the marginalized and the vulnerable, both during  
51 and after the crisis.

52

53

54

55

56 **Introduction**

57

58 The novel coronavirus (Covid-19), taxonomically termed SARS-CoV-2, first emerged in  
59 Wuhan, China during late 2019 and was labeled a public health emergency by the World  
60 Health Organization (1). The recent and rapid increase in the number of Covid-19 cases,  
61 43,07,287 as on 15<sup>th</sup> May 2020 globally (2), has increased panic across countries (3). Every  
62 country affected by the virus adopted several measures in order to curb its spread. India,  
63 home to 1.3 billion people, announced a nationwide “lockdown” on 25<sup>th</sup> March 2020 (4). The  
64 lockdown restricted citizens’ physical mobility, advocated social distancing norms, and  
65 limited a majority of public services while allowing the essentials. However, these measures  
66 of sheltering-in-place, equivalent to an extended quarantine, likely created a stressful  
67 environment for the citizens, given the sudden disruption in their daily routines (5,6). These  
68 disruptions could contribute towards adverse psychological outcomes such as post-traumatic  
69 stress symptoms (7) and aggressive behaviors (8). For instance, one Indian study by Gautam  
70 & Sharma (9), highlighted that lockdown could increase the psychological toll on the Indian  
71 academic fraternity because of the disruption in their work, which additionally brings  
72 financial instability to the contractual staff. However, the impact of a lockdown might vary  
73 across diverse social groups. Individuals who are living alone or away from family (or loved  
74 ones), suffering from economic losses, and have a history of negative psychological states,  
75 could be at higher risk of depression, loneliness, and anxiety disorders during the lockdown.  
76 For instance, queer individuals, known to be already burdened with minority stressors which  
77 likely lead to sense of psychological distress (10), could suffer from increased stress during  
78 lockdown. Further, restrictions on physical mobility might have not only disrupted their  
79 social lives but also paused the sexual lives of many, which could lead to several  
80 complications. These disruptions in sexual lives in addition with the on-going stress due to

81 the lockdown could also persuade individuals to (mis)use pornography for coping (11), which  
82 could further lead to depressive symptoms (12).

83 While Covid-19 is non-discriminatory, the psychosocial impact of its spread could also vary  
84 across diverse social groups. For instance, the impact on individuals with a known higher risk  
85 of contracting Covid-19, such as the elderly or those with co-morbid conditions, might be  
86 different from individuals with a lower risk. The extent of daily exposure to the pandemic  
87 may also matter: A study from Wuhan, China, found a high prevalence of depressive  
88 symptoms among frontline healthcare workers (13). Similarly, another study from Australia  
89 showed that people living in high risk infection zones reported higher psychological distress  
90 than those living in uninfected areas (14). These findings suggest that a higher perceived risk  
91 to Covid-19 could increase anticipatory fear and anxiety. This fear, depression, loneliness,  
92 and anxiety during the time of crisis not only could affect mental health but also adversely  
93 affect one's lifestyle and diet, ultimately impacting physical health (15). Previous studies  
94 have shown that depression (or anxiety) worsens sleep disorders (16) and eating disorders  
95 (17).

96 Despite these risks, several personal and social resources could be available for individuals to  
97 cope with the adverse effects of the crisis. In a family-centric country such as India, family is  
98 regarded as a vital social support (18), especially during a crisis. Living with family/relatives  
99 (or regular virtual interactions through phone or Internet media) could act as social support  
100 which could result in lowering stress during the lockdown. Of note, an opportunity to spend  
101 extended time with family members could strengthen family bonds and enhance work-family  
102 balance, leading to a better quality of life (19). The lockdown situation has created  
103 opportunities for many to spend time with family (and loved ones) and improve the quality of  
104 family relationships, if not through physical proximity, virtually. Nevertheless, these  
105 opportunities might act as a situational coercion for a few individuals (who have a history of

106 family maladjustment or family conflict) and induce additional stressors, further increasing  
107 their vulnerability to adverse psychological outcomes during a lockdown.

108 In addition to these social resources, several individual-level characteristics such as the nature  
109 of employment, access to material resources; and, psychological resources such as resilience-  
110 coping and optimism might be beneficial in minimizing the effect of this crisis (20,21).

111 Findings of a recent study from China suggest that positive personal-level characteristics such  
112 as emotional-control and optimism could also help minimizing the negative effects of the  
113 Covid-19 crisis (22).

114 Although these concerns warrant attention in the Indian context, we could locate only a few  
115 studies reporting the prevalence of depression and anxiety during the Covid-19 crisis in India,  
116 including a comparison across age and gender groups (23,24). Moreover, these studies did  
117 not examine the prevalence of these outcomes across other social groups, including the  
118 vulnerable and the hidden group of sexual minorities. The rapid increase in the number of  
119 Covid-19 cases in India and the disruptions due to the lockdown, warrant investigating the  
120 processes explaining any social patterning in the psychosocial wellbeing of Indian citizens  
121 during this crisis. In response, we conducted a mixed-methods study of Indian adults to  
122 unpack how social factors such as sexual orientation, relationship status, and residence in  
123 high-infection areas, could be linked with any negative mental health outcomes during the  
124 lockdown. We also investigated whether a higher risk of the infection and a history of  
125 depression or loneliness worsens the mental health impact of the lockdown. We further  
126 explored the complex processes explaining if and how anxiety and depressive symptoms  
127 were related to sleeping and eating habits during the lockdown. We also investigated the role  
128 individual-level resources played in coping with the effects of the crisis. Because the  
129 lockdown likely changed the nature of social interactions, we additionally examined if this

130 brought any change in how individuals viewed the world and increased their social empathy,  
131 which could be an important psychological resource for overall wellbeing and quality of life.

## 132 **Research questions**

133 The primary research questions explored in this study were:

- 134 1. Do levels of adverse psychological outcomes (depressive symptoms, anxiety,  
135 addiction to the Internet and pornography, frequency of masturbation, and experiences  
136 of hostile attitudes) vary across sexual orientation, relationship status, groups with  
137 varying health risk of Covid-19, history of depression/loneliness, and staying in a  
138 state with a high number of Covid-19 cases? If yes, what processes explain these  
139 differences?
- 140 2. Are anxiety and depressive symptoms related to changes in eating and sleeping habits  
141 among Indian adults during the lockdown?

142 In addition to the above primary questions, inspired by the initial two qualitative interviews,  
143 we also addressed the following in our study:

- 144 3. How are sharing vulnerabilities (stress and depression) with loved ones, and  
145 frequency of interaction with family related to strengthening of social bonds and  
146 social empathy during the lockdown?

## 147 **Methods**

### 148 **Study design**

149 We followed a convergent mixed methods approach (25,26) in our study. First, two  
150 exploratory qualitative in-depth interviews were conducted to refine our research questions.

151 The narratives of the two participants (one male and one female participant) guided us in  
152 identifying key factors affecting their mental wellbeing during the time of the lockdown. The

153 participants shared their frustrations related to the lockdown, the disruption in their routine  
154 work, the chaos around them regarding the increase in number of cases, their challenges in  
155 general, and overall feeling about the entire situation of crisis. Based on the data from these  
156 two interviews, we constructed our online quantitative survey. Data for the study were  
157 collected through the online survey and qualitative interviews simultaneously. However,  
158 whenever the data from the quantitative survey revealed an interesting picture, we dug deeper  
159 about it in our qualitative interviews to understand its complexity and context.

## 160 **Quantitative survey**

161 We carried out an online survey from 9<sup>th</sup> May to 15<sup>th</sup> May 2020. Our survey questionnaire in  
162 the form of an anonymous Google form was circulated through several Facebook groups as  
163 well as WhatsApp and Instagram contacts. We further used a snowball sampling procedure to  
164 increase the number of responses. The authors requested their family members, friends,  
165 colleagues, and professional networks to further spread the form among their networks. The  
166 introductory passage in the Google form briefed the participants about the broad objective of  
167 the study and requested for their voluntary participation. Further, the passage also promised  
168 anonymity and confidentiality to the participants. Due to the online nature of the survey, we  
169 could not limit its spread to a specific geography. However, we specified our eligibility  
170 criteria (Indian citizen, presently residing in India, aged 18 years or above, and who were  
171 willing to fill the form in English) in the introductory passage to maximize the chance that we  
172 only got responses from India. We received responses from 282 participants.

## 173 **Variables and Measures**

### 174 **Response variables**

175 **Anxiety:** We measured anxiety using the General Anxiety Disorder (GAD-7) scale (27). This  
176 widely used scale includes items such as “*Over the past 2 weeks how often have you been*

177 *bothered by the following problems: Feeling nervous, anxious or on edge?"* The responses  
178 were recorded on a 4-point Likert scale ranging from "not at all (0)" to "nearly every day  
179 (3)." We found a good internal consistency of the GAD-7 scale in our sample (Cronbach's  
180 alpha=0.91). The aggregate of the item scores reflected the total anxiety score.

181 **Depressive symptoms:** We assessed depressive symptoms of our participants using the short  
182 version of the CESD-D scale, a 10-item scale (28). The scale includes items such as "In the  
183 past week how often have you felt any of these: *I had trouble keeping my mind on what I*  
184 *was doing.*" Two items were reverse scored. The responses to the items varied from "less  
185 than a day" (0) to "5-7 days" (3). We later discovered that responses to one item (*I was*  
186 *bothered by things that usually do not bother me*) did not get recorded possibly due to some  
187 technical error in the Google form. However, following Siddiqui (29) and Hawthorne et al.  
188 (30), we imputed the person-mean score for the missing item. We found good internal  
189 consistency of the scale (including the imputed score) in our sample (Cronbach's  
190 alpha=0.86). The item total was used as the depressive symptom score.

191 **Symptoms of the Internet addiction:** We used the Internet Addiction Test (IAT) scale (31)  
192 to measure symptoms of addiction of the Internet. The scale includes 12 items such as "*Over*  
193 *the past 2 weeks, how often have your felt: find yourself saying "just a few more minutes"*  
194 *when online?"* Responses varied from *rarely* (1) to *always* (5). The Cronbach's alpha was  
195 found to be 0.92. The total score of all 12 items yielded the Internet addiction score.

196 **Symptoms of pornography addiction:** The Compulsive Pornography Consumption (CPC)  
197 scale (32) was used to assess the symptoms of addiction of pornography. The 6-item scale  
198 included items such as "*Please indicate how these statements described you during the past 2*  
199 *weeks: I thought of pornography (porn) when I was trying to focus on other things.*" The  
200 responses were recorded on a 7-point Likert scale ranging from *never* (1) to *very frequently*



201 (7). The Cronbach's alpha was 0.87 in our sample. The sum total of the scores of all items  
202 resulted in the pornography addiction score.

203 **Experiences of hostility:** A single item was used to measure experiences of hostility during  
204 the lockdown: *Have you been facing the following problems in the last 2 weeks? You faced a*  
205 *hostile situation (including emotional, physical, and mental violence) from anyone in the*  
206 *place you are currently in.* Responses were recorded as *yes* and *no*.

207 **Change in food habits (time and consumption):** We assessed any change in the  
208 participants' food habits using a single item: *Have you been facing the following problems in*  
209 *the last 2 weeks? Food patterns (type of foods consumed/timings) have changed.* Responses  
210 varied from *not at all* (1) to *always* (5).

211 **Sleeping problems:** Sleeping problems were measured using a combination of two items,  
212 *have you been facing the following problems in the last 2 weeks? Your sleep cycle has*  
213 *changed drastically,* and *You have difficulty in falling asleep.* The responses varied from not  
214 at all (1) to always (5). The additive score yielded the level of sleeping problem with scores  
215 ranging from 2 to 10.

216 **Frequency of masturbation:** Frequency of masturbation was assessed using a single item,  
217 *how often are you engaging yourself in masturbation activities in the last 4 weeks?* The  
218 responses varied from *never* (1) to *multiple times a day* (6).

219 **Social empathy and quality of social relationships:** Social empathy was operationalized  
220 based on the participants' choice of several options offered. The selection of any of the  
221 following options: *You have become more socially responsible; you have become more active*  
222 *in neighborhood associations/groups or other social groups near your residence; You have*  
223 *been thinking about the vulnerable in our society and tried to do at least something for them*  
224 *(donating or helping in other ways)* indicated increased social empathy coded as 1 (otherwise

225 0). Similarly, the quality of social relationships was recorded as 1 (improved), if the  
226 participants selected even one of the following options: *You have started liking to spend time*  
227 *with your closed ones more than before; you have strengthened your relationship with your*  
228 *friends; and you have strengthened your relationship with your family/partner*, otherwise as  
229 0.

## 230 **Predictors**

231 **Sharing stress and anxiety with loved ones:** If participants selected “yes” to the question  
232 *have you shared your stress and vulnerability with loved ones during the lockdown*, it was  
233 coded as 1, else as 0.

234 **Resilience coping:** We assessed resilience coping of the participants using the 4-item Brief  
235 Resilience Coping Scale (BRCS) (33). The scale included items such as *I look for creative*  
236 *ways to alter difficult situations*, with responses varying from *does not describe me at all* (1)  
237 *to describes me very well* (5). The aggregated score of all items reflected the participants’  
238 resilience. The Cronbach’s alpha was 0.82.

239 **Optimism:** Optimism was measured using the 10-item Revised Life Orientation Test (LOT-  
240 R) scale (34). It included items such as *in uncertain times, I usually expect the best* while  
241 responses ranged from, *I disagree a lot* (1) to *I agree a lot* (5). Four items were fillers and  
242 were removed from the analysis. The aggregate of all item scores resulted in the optimism  
243 score. We found moderate internal consistency of the scale in our sample (Cronbach’s  
244 alpha=0.55).

245 **Change in frequency of calling family members:** We compared the frequency of calling  
246 family members during the lockdown with that during October 2019-March 2020. We treated  
247 this as an indicator of the change in frequency of calling family members during the  
248 lockdown. We coded it as 1 if the frequency increased, otherwise as 0.

249 **High-risk group:** Individuals who reported having any of the following: chronic respiratory  
250 illnesses, diabetes, heart disease, hypertension, or a weakened immune system, were  
251 categorized as belonging to the “high-risk group (1)”, else as “low-risk group (0).”

252 **History of depression/loneliness:** We grouped the participants who reported having a history  
253 of depression or loneliness as “group with history of depression/loneliness (1)”, otherwise  
254 “group with no history of depression/loneliness (0).”

255 **Categories of state exposed to Covid-19:** We referred to data from Ministry of Health and  
256 Family Welfare, India (35) for categorizing the states as per the counts of Covid-19 cases.  
257 We coded Maharashtra (with cases more than 25000 during the data collection) as “highest  
258 exposure;” Tamil Nadu, Gujarat and New Delhi (with around 10,000 cases) as “high  
259 exposure;” Rajasthan, Madhya Pradesh, and Uttar Pradesh (near to 5000 cases) as “moderate  
260 exposure”; and rest of the states as “low exposure.”

261 **Sociodemographic characteristics:** We also collected information on age (18-29/30-44/45-  
262 59/and above 60 years), gender (male/female/others), sexual orientation (straight/queer),  
263 relationship status (opposite-sex relationship/same-sex relationship/single/complicated), place  
264 of residence (rural/urban), educational qualification (postgraduate/graduate or diploma/12<sup>th</sup> or  
265 lower), and annual income in Indian Rupees (0-3,00,000/3,00,000-10,00,000/10,00,000-  
266 20,00,000/above 20,00,000), and the state of residence.

## 267 **Qualitative strand**

268 We conducted 14 in-depth interviews from 10<sup>th</sup> May through 17<sup>th</sup> May 2020. We circulated  
269 an advertisement inviting participants for telephonic interviews through social media  
270 (Facebook, Instagram, and Twitter) and personal contacts of the authors. The advertisement  
271 included a brief introduction about the study, contact information of the first author (also the  
272 interviewer) the nature of the interviews, and about the approximate length of the interview.

273 The introduction also informed the participants about the sensitive nature of the topic (which  
274 included questions on their personal/intimate lives) and asked their preferences of the gender  
275 of the interviewer. However, none of the participants shared concerns being interviewed by  
276 AJS (a man). Interested participants contacted AJS through email/Facebook/WhatsApp  
277 showing their willingness to participate. AJS and the participants mutually agreed on a time  
278 for the telephonic interview. Before beginning the interview, AJS once again briefed the  
279 participants about the study; and informed them about their anonymity and confidentiality of  
280 data, and that the interview would be terminated at any point the participant showed  
281 discomfort. In addition to verbal consent, AJS also sought consent to audiotape the  
282 interviews. Four participants were reluctant to get the interviews audiotaped. Detailed notes  
283 (including several quotes) were taken during these interviews. All interviews began with  
284 broader questions like “How do you feel about the entire situation (of Covid-19 and  
285 lockdown)?” AJS was cautious while asking personal questions, especially about romantic  
286 and sexual lives of the participants. AJS ensured participants’ comfort, not only while asking  
287 sensitive questions, but throughout the interview process, by taking a pause and asking,  
288 “should we proceed?” However, there were no instances where there arose the need to  
289 terminate any interview. All participants shared their emotions, vulnerabilities, moods,  
290 challenges, change of lifestyle, and perceived wellbeing during the lockdown (and the Covid-  
291 19 crisis). Specific comments regarding the mood and context were noted by AJS to give  
292 rigor to the analysis. At the end of the interviews, the participants were requested to share  
293 about the study with their peers and network, seeking their participation. The length of the  
294 interviews ranged from 28 minutes to 1 hour 40 minutes.

295 Eight participants were recruited through the advertisement while 2 participants were  
296 recruited through snowball sampling. Additionally, we allowed the participants of the online  
297 quantitative survey to express interest for a follow-up telephone call. We recruited 4

298 participants through this method. Different methods of recruitment helped us get a socially  
299 diverse sample in a short time.

300 In addition to the interviews, we collected data through an open-ended question in the online  
301 quantitative survey. This allowed the participants to share their concerns related to the  
302 pandemic situation (and lockdown). Extracted quotes were used in our qualitative analysis.

### 303 **Analyses**

#### 304 **Quantitative analysis**

305 The distribution of all continuous variables was checked for normality (36). Next, we fitted  
306 separate multivariable linear regression models to estimate the association of the independent  
307 variables (gender, sexual orientation, relationship status, occupation, high-risk group, and  
308 living in a states with high number of cases) with psychological outcomes (anxiety,  
309 depressive symptoms, Internet and pornography addiction) adjusted for the sociodemographic  
310 covariates—age, gender, annual income, educational qualification, place of residence—and  
311 for individual personal resources (optimism and resilience). We fitted separate logistic  
312 regression models to estimate the associations of sexual orientation and relationship status  
313 with the binary variable indicating the experience of hostility, adjusting for all  
314 sociodemographic variables.

315 We also fitted multivariable linear regression models to estimate the association of anxiety  
316 and depressive symptoms with changes in sleep and food cycles (separate models), adjusted  
317 for the sociodemographic covariates and personal resources.

318 Additionally, we fitted separate logistic regression models to estimate the association of  
319 increased frequency of calling family members with social empathy and the quality of social  
320 relationships adjusted for sociodemographic covariates. For all our analyses, alpha was set at  
321 0.05. All statistical models were run in Stata version 12 (37).

322 We chose a thematic analysis approach (38) to analyze the qualitative data. The analysis  
323 began with AJS (who also conducted all the interviews) familiarizing himself with the data  
324 by spending prolonged time in re-listening to the audiotaped interviews and reviewing the  
325 transcript excerpts. The participants' narratives about their emotional responses to the  
326 situation; their description of how the lockdown affected their routine, relationships, and  
327 social responsibilities; their sense of self (including their body); their perspective on life;  
328 their coping mechanisms; and, views towards a "new world" guided the coding process. Four  
329 themes emerged from these indexed codes (39) and the detailed comments. Additionally,  
330 NVT (an external researcher) categorized the themes emerging from the codes. The coding  
331 scheme was discussed among the two authors (and NVT), and after critical analysis, the  
332 themes were confirmed with a high inter-coder reliability (40). Follow-up interviews with  
333 two participants were carried out separately for respondent validation (41). Additionally,  
334 several quotes from the open-ended section of the online survey were included in the themes  
335 that emerged from the qualitative interviews allowing better representation of all the voices  
336 heard.

337 Both quantitative and qualitative findings carried equal weight in this study. The qualitative  
338 themes that emerged gave richer context to the quantitative results during the interpretation  
339 phase.

#### 340 Positionality

341 The study was motivated by previous work of AJS and MAS on the queer community, and  
342 their understanding of the community's unique vulnerabilities. Apart from this, the lockdown  
343 has severely restricted the ability of AJS and MAS, not only in terms of physical mobility but  
344 also in terms of distance from loved ones and has affected their productivity. Interviews by  
345 AJS were conducted with this frame of reference.

346 **Ethical considerations**

347 The study was approved by the Institutional Ethics Committee, IIT Gandhinagar, India.  
348 Utmost precaution was taken by AJS while conducting the telephonic interviews. The  
349 participants were informed about the sensitive nature of the questions and were informed that  
350 they could skip any question. AJS constantly monitored the mood of the conversation and  
351 frequently asked the participants about their willingness to continue. Names of all  
352 participants have been changed in this study to protect anonymity.

353 **Results**

354 **Quantitative results**

355 We analyzed a sample of 282 Indian adults who responded to the online survey. A majority  
356 (~75%) of our participants were 30 years or younger. Around 60% identified themselves as  
357 male, and about 77% reported to be heterosexuals. Only a small proportion (~12%) of our  
358 participants had education less than 12<sup>th</sup> standard (high school). Greatest proportion (~81%)  
359 of the participants resided in Urban areas.

360 Table 1: Sociodemographic characteristics of participants of the quantitative survey (n=282)

|                             | Frequency (%) | Anxiety M (SD) | Depressive symptoms M (SD) | Addiction to Internet M (SD) | Addiction to pornography M (SD) |
|-----------------------------|---------------|----------------|----------------------------|------------------------------|---------------------------------|
| <b>Age group (in years)</b> |               |                |                            |                              |                                 |
| 18-29                       | 212 (75.71)   | 7.07 (5.84)    | 12.65 (7.13)               | 29.18 (11.53)                | 13.43 (8.54)                    |
| 30-44                       | 48 (17.14)    | 4.02 (3.68)    | 10.21 (7.39)               | 22.65 (8.19)                 | 12.09 (6.58)                    |
| 45-59                       | 15 (5.36)     | 6.28 (6.86)    | 9.87 (9.05)                | 29.55 (16.31)                | 11.71 (8.44)                    |
| 60 and above                | 5 (1.79)      | 5.8 (6.68)     | 11.48 (9.95)               | 29 (12.28)                   | 12.6 (9.04)                     |

|                                         |                |                 |                 |                  |              |
|-----------------------------------------|----------------|-----------------|-----------------|------------------|--------------|
| <b>Gender</b>                           |                |                 |                 |                  |              |
| Male                                    | 175<br>(62.50) | 6.15<br>(5.82)  | 11.31<br>(7.36) | 28.43<br>(11.33) | 14.90 (8.37) |
| Female                                  | 102<br>(36.43) | 6.90<br>(5.25)  | 13.14<br>(7.06) | 27.43<br>(11.68) | 10.08 (7.08) |
| Other                                   | 3 (1.07)       | 12.33<br>(9.07) | 19.62<br>(4.62) | 25.33<br>(13.05) | 11.66 (8.14) |
|                                         |                |                 |                 |                  |              |
| <b>Sexual orientation</b>               |                |                 |                 |                  |              |
| Heterosexual                            | 218<br>(77.86) | 5.95<br>(5.44)  | 11.72<br>(7.39) | 27.26<br>(11.55) | 12.10 (8.02) |
| Sexual minority                         | 62 (22,14)     | 8.23<br>(6.18)  | 13.46<br>(6.89) | 30.63<br>(10.75) | 16.44 (8.06) |
|                                         |                |                 |                 |                  |              |
| <b>Educational qualification</b>        |                |                 |                 |                  |              |
| Postgraduate                            | 160<br>(57.35) | 6.60<br>(5.88)  | 12.25<br>(7.52) | 26.99<br>(11.46) | 12.24 (7.53) |
| Graduate/Diploma                        | 94 (33.69)     | 6 (5.44)        | 11.78<br>(7.15) | 28.72<br>(10.98) | 14.18 (8.98) |
| 12th or lower                           | 25 (8.96)      | 7.04<br>(5.20)  | 12.04<br>(6.72) | 31.14<br>(11.65) | 14.90 (9.55) |
|                                         |                |                 |                 |                  |              |
| <b>Annual income (in Indian Rupees)</b> |                |                 |                 |                  |              |
| 0-3,00,000                              | 56 (20.82)     | 6.48<br>(5.01)  | 13.41<br>(7.41) | 29.22<br>(12.29) | 14.17 (8.13) |
| 3,00,000-10,00,000                      | 115<br>(42.75) | 7.27<br>(6.20)  | 12.85<br>(6.94) | 29.31<br>(11.55) | 13.65 (8.41) |
| 10,00,000-20,00,000                     | 60 (22.30)     | 5.93<br>(5.29)  | 10.41<br>(6.61) | 26.19<br>(10.14) | 12.45 (8.55) |
| above 20,00,000                         | 38 (14.13)     | 5.32<br>(5.55)  | 10.78<br>(8.12) | 24.19<br>(10.53) | 11.30 (7.39) |
|                                         |                |                 |                 |                  |              |
| <b>Place of residence</b>               |                |                 |                 |                  |              |
| Rural                                   | 53 (18.93)     | 6.73<br>(5.52)  | 12.48<br>(6.81) | 29.26<br>(11.71) | 12.37 (6.98) |
| Urban                                   | 227<br>(81.07) | 6.42<br>(5.74)  | 12.01<br>(7.42) | 27.76<br>(11.39) | 13.24 (8.47) |

361

362 **Anxiety and depressive symptoms across social groups**



363 Our fully adjusted models (adjusted for gender, age, educational qualification, income, and  
 364 place of residence) (see Table 2) found that GAD scores were higher, on average, in sexual  
 365 minorities ( $\beta=2.44$ , CI: 0.58, 4.31) versus heterosexuals, high-risk group ( $\beta=2.20$ , CI:0.36,  
 366 4.05) versus low-risk group, and participants with history of depression/loneliness ( $\beta=3.89$ ,  
 367 CI:2.34, 5.44) versus participants with no history of depression/loneliness. However, GAD  
 368 scores were lower for single participants ( $\beta= -2.35$ , CI: -4.30, -0.39) than those who were in  
 369 opposite-sex relationships. Although statistically not significant, our fully adjusted model  
 370 found lower GAD scores among participants who were in same-sex relationships ( $\beta= -0.28$ ,  
 371 CI: -6.24, 5.68) than opposite-sex relationships. We could not find statistically significant  
 372 associations of living in a state reporting a high count of Covid-19 cases with anxiety  
 373 symptoms.

374 Unsurprisingly, we found a statistically significant association of a history of  
 375 depression/loneliness with increased depressive symptoms during the lockdown ( $\beta=4.34$ , CI:  
 376 2.38, 6.30), independent of other covariates. However, we could not find any evidence  
 377 linking sexual orientation, relationship status, living in a state reporting a high count of  
 378 Covid-19 cases, and belonging to a high-risk group with depressive symptoms.

379 Table 2: Associations of sexual orientation, relationship status, risk of Covid-19 infection,  
 380 history of depression/loneliness, and state's exposure to Covid-19 (regression coefficients  
 381 ( $\beta$ ), and 95% confidence intervals) with anxiety, depressive symptoms, and addiction to the  
 382 Internet and pornography (Also sexual orientation and relationship status (adjusted odds  
 383 ratios (AOR, 95% confidence intervals) with experiences of hostility during the lockdown  
 384 among Indian adults.

|  | Anxiety* | Depressive symptoms* | Addiction to Internet* | Addiction to pornography* | Experiences of hostility (AOR)# |
|--|----------|----------------------|------------------------|---------------------------|---------------------------------|
|--|----------|----------------------|------------------------|---------------------------|---------------------------------|

|                                         |                         |                         |                         |                        |                      |
|-----------------------------------------|-------------------------|-------------------------|-------------------------|------------------------|----------------------|
| <b>Sexual orientation</b>               |                         |                         |                         |                        |                      |
| Heterosexual (ref)                      |                         |                         |                         |                        |                      |
| Sexual minority                         | 2.440 (0.567, 4.313)    | 1.988 (-0.464, 4.441)   | 3.638 (-0.075, 7.352)   | 2.724 (0.089, 5.358)   | 1.632 (0.824, 3.231) |
| <b>Relationship status</b>              |                         |                         |                         |                        |                      |
| Opposite-sex relationship (ref)         |                         |                         |                         |                        |                      |
| Same-sex relationship                   | -0.281 (-6.238, 5.675)  | -2.776 (-10.318, 4.766) | -2.701 (-14.234, 8.830) | 9.341 (0.976, 17.705)  | 0.529 (0.052, 5.333) |
| Single                                  | -2.347 (-4.306, -0.389) | -2.029 (-4.506, 0.446)  | 0.461 (-3.315, 4.238)   | 0.541 (-2.168, 3.251)  | 0.859 (0.439, 1.680) |
| <b>Risk to Covid-19</b>                 |                         |                         |                         |                        |                      |
| Low-risk group (ref)                    |                         |                         |                         |                        |                      |
| High-risk group                         | 2.203 (-0.360, 4.046)   | 0.832 (-1.565, 3.230)   | 0.458 (-3.234, 4.151)   | 2.805 (0.223, 5.387)   | -                    |
| <b>History of depression/loneliness</b> |                         |                         |                         |                        |                      |
| No history (ref)                        |                         |                         |                         |                        |                      |
| with history                            | 3.892 (2.343, 5.440)    | 4.341 (2.378, 6.304)    | 4.547 (1.466, 7.628)    | 2.635 (0.406, 4.863)   | -                    |
| <b>Group of states</b>                  |                         |                         |                         |                        |                      |
| Highest exposure (ref)                  |                         |                         |                         |                        |                      |
| High exposure                           | -1.625 (-4.490, 1.239)  | -1.135 (-4.827, 2.557)  | -3.488 (-8.992, 2.015)  | 0.753 (-3.160, 4.668)  | -                    |
| Moderate exposure                       | -1.244 (-4.374, 1.885)  | -0.086 (-4.072, 3.899)  | -2.286 (-8.234, 3.661)  | -0.532 (-4.830, 3.766) | -                    |
| Lowest exposure                         | -0.972 (-3.885, 1.939)  | 0.561 (-3.160, 4.284)   | -3.872 (-9.423, 1.677)  | 1.491 (-2.485, 5.467)  | -                    |

385

386 \* Adjusted for age, gender, income, education, place of residence, optimism, and resilience.

387 # Adjusted for age, gender, income, education, and place of residence.

388 **Addiction to the Internet and pornography, frequency of masturbation across groups**

389 We found that a history of depression/loneliness was statistically significantly associated with  
390 higher Internet-addiction symptoms ( $\beta=4.55$ , CI: 1.47, 7.63), independent of all other  
391 covariates. However, we could not find evidence that other predictors were associated with  
392 Internet addiction.

393 Moreover, our fully adjusted models showed greater symptoms of pornography addiction, on  
394 average, in sexual minorities ( $\beta=2.72$ , CI: 0.09, 5.36) versus heterosexuals, in the high-risk  
395 group ( $\beta=2.80$ , CI: 0.22, 5.39) versus low-risk group, in participants in same-sex  
396 relationships ( $\beta=9.15$ , CI: 0.93, 17.38) versus opposite-sex relationships, and among those  
397 with a history of depression/loneliness ( $\beta=2.63$ , CI: 0.41, 4.86) versus no such history.  
398 Additionally, our adjusted models revealed that sexual minorities ( $\beta=1.39$ , CI:0.94, 1.86) and  
399 participants in same-sex relationships ( $\beta=2.07$ , CI=0.50, 3.63) reported a higher frequency of  
400 masturbation during the lockdown compared to their heterosexual peers.

#### 401 **Experiences of hostility**

402 We did not find statistical evidence that experiences of hostility differed across sexual  
403 orientation and relationship status. Although statistically not significant, sexual minorities  
404 (versus heterosexuals) had higher odds of experiencing hostility (AOR=1.63, CI: 0.82, 3.23)  
405 during the lockdown independent of the sociodemographic covariates.

#### 406 **Association of anxiety and depressive symptoms with food and sleep habits**

407 Our fully adjusted models (adjusted for sociodemographic variables and positive resources)  
408 (see Table 3) showed that higher depressive symptoms and anxiety symptoms were  
409 associated with greater reports of self-reported sleep disorders ( $\beta=0.16$ , CI: 0.11, 0.20 and  
410  $\beta=0.19$ , CI: 0.14, 0.25, respectively) and self-reported changes in food pattern ( $\beta=0.05$ , CI:  
411 0.03, 0.08 and  $\beta=0.08$ , CI: 0.05, 0.11).

#### 412 **Social empathy and quality of relationships**

413 Our fully adjusted logistic regression models (see Table 3) showed that participants who  
 414 increased the frequency of calling their family members during the lockdown (compared to 6  
 415 months earlier) had higher odds of enhancing the quality of their social relationships  
 416 (AOR=2.56, CI: 1.19, 5.52), and reporting increased social empathy (AOR=2.27, CI: 1.06,  
 417 4.88), independent of all sociodemographic covariates. Moreover, our models found that  
 418 sharing vulnerabilities (stress/depression) with loved ones was associated with higher odds of  
 419 being socially empathetic (AOR=3.99, CI:1.95, 8.14), and enhancing social relationships  
 420 (AOR=2.96, CI: 1.52, 5.74), after accounting for all sociodemographic covariates.

421 Table 3: Associations of anxiety and depressive symptoms (regression coefficients ( $\beta$ ), and  
 422 95% confidence intervals) with sleep and food related problems; and of sharing of stress and  
 423 increased frequency of calling family members (adjusted odds ratios (AOR, 95% confidence  
 424 intervals) with the quality of social relationships and social empathy among Indian adults.

|                                                      | Sleep related problems ( $\beta$ )* | Food related problems ( $\beta$ )* | Social relationships (quality) (AOR)# | Social empathy (AOR)# |
|------------------------------------------------------|-------------------------------------|------------------------------------|---------------------------------------|-----------------------|
| <b>Anxiety</b>                                       | 0.19 (0.14, 0.25)                   | 0.08 (0.05, 0.11)                  | -                                     | -                     |
| <b>Depressive symptoms</b>                           | 0.16 (0.11, 0.20)                   | 0.05 (0.03, 0.08)                  | -                                     | -                     |
| <b>Sharing of stress with others</b>                 | -                                   | -                                  | 2.96 (1.52, 5.74)                     | 3.99 (1.95, 8.14)     |
| <b>Increased frequency of calling family members</b> | -                                   | -                                  | 2.56 (1.19, 5.52)                     | 2.27 (1.06, 4.88)     |

425

426 \* Adjusted for age, gender, income, education, place of residence, optimism, and resilience.

427 # Adjusted for age, gender, income, education, and place of residence.

428

429 **Qualitative results**

430 Fourteen participants shared with us the slices of their lives during the lockdown. Of the 14  
431 participants, 8 were male, 5 were female, and 1 identified themselves as a non-binary  
432 transgender. Six of the 14 identified themselves as sexual minorities. Four were students, 5  
433 worked in private/public sectors (hereafter “service”), and 5 engaged in  
434 business/entrepreneurship. The thematic analysis of the narratives of these 14 participants  
435 revealed four broad themes. Not all participants’ narratives highlighted all the themes;  
436 however, each participant’s narrative was reflected in at least one theme.

437 **Theme 1: Emotional responses to “*distance from the real world*”**

438 All 14 participants expressed their unique concerns about the lockdown situation. Words such  
439 as “frustrated,” “stressed,” “angry,” and “suffocated,” were frequently used to describe their  
440 emotions. Although the intensity of the negative impact of the lockdown varied across  
441 participants, most participants (9/10) shared how the lockdown disrupted their lives causing  
442 frustration and agitation. For instance, Ashok (name changed) (male, heterosexual, service, in  
443 his 20s) shared,

444 *Initially it was chill. I thought things would ease out pretty fast. But it now looks like an*  
445 *exceptionally long pause. Each and every day I feel there is an increase of frustration...*  
446 *Hmm... let me put it as...it is like a feeling of anxiety...about the future. We do not know if*  
447 *things would be the same. Especially, am concerned about my work. My work got stuck. Upar*  
448 *se (on top of that), you hear about the increasing number of cases in your own neighborhood.*  
449 *All these accumulate and makes you lose your patience. I have not been able to put my focus*  
450 *on work (since he was working from home). And for me, productivity takes very long to*  
451 *revive once it goes down.*

452 Similar responses of frustration were shared by several students who had mostly enjoyed an  
453 outdoorsy life, be it spending time on their college campuses or with friends outside.

454 However, a few shared a different reason for their anxiety: Living in a place with a high  
455 number of Covid-19 cases. Rajini's (female, heterosexual, homemaker, in her 30s) narrative  
456 is an example:

457 *We are in a containment (severe movement restriction) zone, and since the last 12 days none*  
458 *of us have stepped out of the house. And you know what the situation is in Bombay (Mumbai)*  
459 *right now! It is pretty stressful [...] I have personally kept myself off from news, but there is*  
460 *always social media to give that to you. If you ask me now, I really do not know what the*  
461 *number of cases is, or even what is happening around the neighborhood. I just am*  
462 *desperately waiting for the day when we all will be safe.*

463 While several respondents shared the fear they felt currently due to a high number of Covid-  
464 19 cases in their areas, two respondents, Tulika (female, sexual minority, service, in her 20s)  
465 and Salma (transgender (non-binary), sexual minority, service, in their 40s) shared how this  
466 "worse" time had forced them to revisit their past trauma. Tulika, who had gone through a  
467 break-up one year earlier and was recovering with the help of therapy elaborated,

468 *[...] and then sometime in my head it is like a relapse... earlier I would be going out, meeting*  
469 *friends and keep myself distracted, but now since you do not have that opportunity, it just*  
470 *keeps coming back [...] I have been a workaholic and that's another thing that in therapy we*  
471 *are trying to work on, but given the ample amount of free time you have; it just keeps coming*  
472 *back to you.*

473 Another instance of past trauma being triggered was in the case of Salma (they/their/them),  
474 who had always managed situations of discrimination (against their transgender identity)  
475 calmly but recently lost their temper during such an event.

476 *The policewoman stopped us (them and their partner), and asked me “what do you think you*  
477 *are,” [...] I have always tried to be calm in such situations, but this time, I just lost all my*  
478 *calmness. It was a mix of so many things, my frustration at work during the crisis, my X (a*  
479 *close relative) falling ill just a week before the incident, all these acted together.*

480 Their stories revealed that the stress and anxiety developed during the lockdown had revived  
481 old memories of trauma. Thus, in response, Tulika chose to go through emergency sessions  
482 with her therapist, while Salma failed to stay calm and burst out when faced with gender-  
483 based discrimination.

484 While Tulika and Salma revisited trauma, Anurag (male, sexual minority, businessman, in his  
485 30s) who moved to his relatives’ home during the lockdown felt distant from his “real”  
486 world. He shared,

487 *After I moved out of X (a city in Uttar Pradesh) around 17 years ago, this is the longest time I*  
488 *am spending with them (his close relatives). They are old and in their 70s, and need me*  
489 *during this time, so I came here to live with them. I came here around the X March, maybe*  
490 *the Y, just before the lockdown. Honestly, I am happy to be here for them, but you know,*  
491 *sometimes it feels like you are so far away from your real world. It took me quite some time*  
492 *to confront my own sexuality. And the fact that I stayed away from my X (relatives), who by*  
493 *the way still do not understand the meaning of “gay,” had helped me a lot in coming to terms*  
494 *with myself (sexuality). [...] I miss meeting people. The longer I am here, the more I feel that*  
495 *I am losing the chance to meet my life partner. I know it may sound silly and selfish to you,*  
496 *but for me at this age, losing (even) one single chance of meeting someone is a big thing.*

497 Anurag’s feeling of distance from his “real” world highlighted how uncomfortable he was at  
498 his old home with his relatives. He shared how things around his relatives’ house reminded  
499 him of how uneasy he felt while growing up as a gay man. Anurag was conflicted by a

500 dilemma: While the lockdown brought him closer to his relatives at a time of their need, it  
501 also placed on him an additional psychological burden.

502 The suffocation potentially felt by sexual minorities forced due to the lockdown to stay with  
503 others to whom they were not out was evident in this quote shared via the online survey:

504 *Belonging to sexual or gender minorities in India and spending time with family when you*  
505 *are not open, was already like a cage, with family having lot of expectations and along with*  
506 *societal pressures and humiliations. Closing in (being confined to) a non-accepting society*  
507 *and with high-in-expectation family members is destroying my mental health in COVID-19*  
508 *times. I want to go away from this Society and breathe in fresh air once again where I will*  
509 *not be judged for how I was born.*

510 While a majority of the participants (9/14) shared mostly about their negative states of mind,  
511 a few took a moment to share the positive impact of the lockdown on their lives. For instance,  
512 Rumi (female, heterosexual, businessperson, in her 30s) described how she saw the lockdown  
513 as an opportunity to introspect about her own life.

514 *Not frustrated with it, but I am seeing this as an opportunity that, you know, I have been*  
515 *married for 8 years and there has been so many ups and downs. My life was going without*  
516 *any clarity, but now I am taking this as an opportunity to see what I could do. Life was fast*  
517 *and now it is like I got a break. I do not think of it as a frustration, but it is an opportunity.*  
518 *Since long I was looking for a time where I could sit and do nothing, especially taking a*  
519 *break from my business.*

520 The narrative of Ashish (male, sexual minority, service, in his 20s, HIV positive) highlighted  
521 his equanimity during the crisis. He shared that he did not have any trouble during the  
522 lockdown, mostly because he was an introvert who had always loved spending time indoors.  
523 However, he mentioned that he and his X (close relative whom he was living with) had been



524 adhering to the usual precautions to avoid the virus. He said that he had always been  
525 protective about his health, as was his X (close relative).

526 **Theme 2: Impact of the lockdown/Covid-19 on lifestyle**

527 Almost all participants (11/14) described how their daily routines had changed because of the  
528 lockdown. While many of them were trying to keep themselves healthy by striving to live a  
529 “normal” life, a few mentioned about drastic changes in lifestyle, especially in their eating  
530 and sleep patterns. For instance, Tulika shared how she lost motivation to stick to a routine  
531 during the lockdown.

532 *I usually am a morning person. But ever since this lockdown, my schedule has drastically*  
533 *changed. I have not been waking up early. I am going to sleep around 5 in the morning and*  
534 *continue sleeping till late [...] maybe it is because there is no structure anymore. It is more*  
535 *like what do you look forward to. Earlier I used to wake up, looking forward to something.*  
536 *Maybe to go to work and meet people or just to go out. But now I really do not have a point.*

537 Almost 50% of the narratives suggested such changes in sleep cycles. On the other hand,  
538 Subhash (male, sexual minority, service, in his 20s) shared about changes in food habits  
539 while also highlighting his mild concerns related to the disruption in his sexual life,

540 *I have not been able to keep myself hydrated properly, earlier I had a schedule for that too,*  
541 *and now I feel it is really messed. (He did not have access to a water purifier at home and*  
542 *relied on purchasing mineral water, which was difficult during the lockdown.) Also, the food,*  
543 *now it is like there is no strict schedule ... working out has stopped as well. I guess these are*  
544 *the things that majorly got influenced. Also, sex. Earlier I used to meet people, not very active*  
545 *sexually I would say but 3-4 times a month, but yeah once a while. But now, there is this*  
546 *longer break. [...] it just made me hornier that I had been in the normal times. But there is no*  
547 *permanent mental impact honestly. I mean you can watch porn and then masturbate, that is*

548 *it. But yeah, there is this constant yearning is there in the back of the mind, like, as soon as*  
549 *the lockdown is over, I would start dating again, and so on.*

550 Rumi however understood this “bad time” as an opportunity to work on herself, a point  
551 shared by three other participants. She believed that she could explore a completely different  
552 side of hers because of this long break from her busy work. She narrated,

553 *I have been experimenting with my life these days. I wake up early and do yoga and then*  
554 *meditation, and then helped my X (a close relative) with some household chores. Currently, I*  
555 *think I feel physically very light, maybe because of exercise. The free time has helped me a lot*  
556 *to explore these, which otherwise was not really possible given the busy life that I had.*

### 557 **Theme 3: Coping with challenges**

558 Each participant shared unique stories of coping with the crisis. While most adapted  
559 themselves to the “smaller world,” a few struggled with it and found alternate ways to  
560 negotiate their challenges. A few other participants were positive about the crisis, spending  
561 time relaxing or pursuing long-held passions. For instance, Rumi described her introspective  
562 exploration and enhanced ability to connect with the society through solitude and meditation.

563 *[...] then I was doing nothing and looking at trees and people around... and then... cooking*  
564 *has been one thing that I am enjoying these days... I have also been listening to Sadhguru*  
565 *which I have never done before... in fact I have hated all these... but now... maybe I have*  
566 *found him very interesting [...] I have also engaged in meditation, and book reading... so I*  
567 *am happy (about this).*

568 On the other hand, Tulika kept her mind distracted from the “outside chaos” by immersing  
569 herself in social media. For instance, Tulika shared,

570 *The number of hours I am awake, I am using social media. Even if I am going to sleep, I will*  
571 *mindlessly keep scrolling until I fall asleep. Because these are the places currently where you*  
572 *see people. Otherwise it is quite just you. I think it is a good place to connect. It keeps me*  
573 *engaged.*

574 Tulika's narrative indicates that the online activities have connected her with the outside  
575 world, which created an avenue for her to share her vulnerabilities with others through online  
576 interactions (messaging and commenting on posts). Notably, more than 50% of the  
577 participants reported perceiving the Internet as a way to reduce stress and anxiety during the  
578 lockdown. In fact, most of them referred the Internet as the easiest way to keep them  
579 distracted from thinking (or overthinking).

580 A few of the participants who shared their frustration about disruption in their sex lives,  
581 reported finding solace in watching pornography and masturbating. Sujoy (male, sexual  
582 minority, student, in his 20s) quoted,

583 *I think it is the only thing you could right now. I mean I see people online in Grindr (a dating*  
584 *app for sexual minorities), and surprisingly people are still looking for sex. And very*  
585 *honestly, I completely understand this desperateness. Most of them, and that includes me,*  
586 *were having our fun days. And all of a sudden this happens. Initially, even I had the thought,*  
587 *ghar ke paas to jake hookup kar sakte hain (it should be okay to have a hookup close to my*  
588 *place). But I realized immediately that it is not wise enough to meet people during this time,*  
589 *especially when you know that it (Covid-19) could also not show any symptoms[... ] What I*  
590 *do right now is watch porn and jerk off.*

591 Sujoy's initial inclination to violate the lockdown norms to go out of his home to have sex  
592 highlight the repercussions of sudden disruptions in an active sexual life. Similarly, a

593 participant (male, heterosexual, student, 18-25 years old) answering the online quantitative  
594 survey shared via the open-ended question:

595 *My sexual desires are making me feel more anxious to masturbate, as a single (man), very*  
596 *often during this lockdown period.*

597 **Theme 4: New perspectives on self, life, and society**

598 Ten of the 14 participants believed that their lives were no longer the same. They believed  
599 that they had changed significantly in terms of how they viewed their selves and society in  
600 general. For instance, Tulika said,

601 *Earlier I used to be worried about very little things, and now it has changed drastically,*  
602 *maybe after spending so much time with myself. I am clearer about my life. I feel I got clarity*  
603 *and I see a huge change in myself. I feel spending time with myself has been the best thing.*

604 Similar observation was made by Rumi, who pointed out that,

605 *[...] my mental state is also is very different than before. Earlier I used to get irritated,*  
606 *worried, angry frequently, but now I feel that I am quite easy, surprisingly, even with my*  
607 *husband. We used to fight (giggles) but now I see that I have been very much calm even with*  
608 *him. It is more because of a lot of things, like about spending time with myself.*

609 The universal vulnerability, extended time to reflect on their lives, and sharing their  
610 vulnerabilities with others had increased the participants' level of compassion and social  
611 empathy, which further strengthened their relationships with their loved ones. This was  
612 reflected in what Tulika shared,

613 *What I have learnt from this entire situation is that you do not take things for granted*  
614 *anymore, even for like interacting with people. I connected with a lot of friends lately, made a*  
615 *couple of new friends as well, and I feel the conversations are no longer superficial but they*

616 *seem very real, even though we are not in the same physical space but I feel closer to the*  
617 *people more than when we were closer physically [...]* People have become more vulnerable  
618 *and have started sharing. Everyone is going through some upheaval right now with this*  
619 *feeling and everyone is trying to connect with others. We are in our mid 20s and everyone is*  
620 *going through this time in pretty much (a) similar way, a huge disruption in our lives I would*  
621 *say. So, we become more vulnerable, now I guess these feelings of vulnerability comes out,*  
622 *when you are sharing. And especially when you know that the other person is going through*  
623 *the same as well, and it actually also allows you to connect to the society at large...to a wide*  
624 *range of people.*

625 Similarly, Rajan (male, heterosexual, student, in his 30s) reflected,  
626 *Thinking of my parents, who are in their 60s, and knowing about their vulnerability makes*  
627 *me think more and more my own life. Also, you know that you are in a privileged position to*  
628 *understand lockdown and follow self-quarantine measures. But there are people (who are)*  
629 *like my parents, in their 60s, (but unlike his privileged parents) who cannot afford to sit*  
630 *inside their homes for like 40 days. I have started to think more and more about them,*  
631 *especially knowing that people are dying because of hunger and poverty during this crucial*  
632 *time. While we all are affected by this virus, we all are suffering differently.*

633 While the narratives of Tulika and Rajan highlighted how their vulnerabilities connected  
634 them to the society at large, Rumi shared how the situation (and thus the vulnerability)  
635 strengthened her relationship with her husband of eight years. She narrated,  
636 *I think that I am looking forward to it (reuniting with her husband who was stuck in a*  
637 *different city due to the lockdown) and I have a very strong feeling that it would be very*  
638 *different than before, because I am in a completely different situation now. Also, because I*  
639 *was not clear about my life, I would say we did not have a great relationship. I mean not “not*

640 *great” but we used to fight a lot. But now I feel little concerned and am little worried about*  
641 *him given the whole situation. And then I realized what is important, that the person is*  
642 *important. I also realized where I was wrong and about my frustration. Now I can say I am*  
643 *looking forward to a much better relationship.*

644 Rumi considered the lockdown situation as an opportunity to reflect upon her own life, tried  
645 to connect with people around her, spent longer time in spiritual, motivational, and  
646 meditational activities—all of which had helped her find meaning in her life and optimism  
647 about her marriage.

## 648 **Discussion**

649 Using quantitative data from 282 Indian adults and qualitative narratives of 14 adults, our  
650 mixed methods study found that even though the Covid-19 crisis indiscriminately affected  
651 everyone, its psychological effects were disproportionate among diverse social groups in  
652 India. Our quantitative and qualitative findings both suggest that sexual minority adults,  
653 compared to the heterosexuals, are at a higher risk of developing anxiety, depressive  
654 symptoms, and addiction to pornography during the lockdown. Moreover, higher levels of  
655 anxiety and depressive symptoms were associated with greater disruption in sleep and food  
656 cycles. Lastly, our findings unpacked how sharing vulnerability with loved ones, and  
657 frequently talking to family members, strengthened social relationships and social empathy  
658 among Indian adults during the Covid-19 lockdown.

659 The higher risk of anxiety in our survey among the sexual minorities than heterosexuals was  
660 corroborated by our qualitative findings. Several reasons might explain this. First, previous  
661 research suggests that the sexual minority community have a higher prevalence of anxiety  
662 and depressive symptoms compared to heterosexuals (42), independent of any crisis. This  
663 could be explained using the Meyer’s Minority Stress model (10), which posits that sexual

664 minorities are exposed to unique and additional stressors related to their minority identity,  
665 which could combine with other stressors to impact psychological wellbeing. Thus, during  
666 the lockdown, their minority stressors (such as sexual orientation-based discrimination and  
667 internalized homonegativity) could interact with the lockdown-related stressors, thereby  
668 increasing their anxiety much more than that experienced by heterosexuals. Second, the  
669 lockdown had likely paused their social as well as sexual lives (which connected them with  
670 their own community) which likely restricted their access to a safe space, and limited the  
671 social support they received from the community (43). Our qualitative findings corroborate  
672 this. Subhash and Sujoy's narratives showed how an interruption in their active sex life could  
673 make the sexual minorities more anxious during the lockdown. This also explains our  
674 qualitative finding which suggests a higher likelihood of addiction to pornography and  
675 greater frequency of masturbation among sexual minorities (and people in same-sex  
676 relationships) during the lockdown compared to heterosexuals (and people in opposite-sex  
677 relationships). This disruption in sexual life could explain our quantitative finding which  
678 suggested greater anxiety among heterosexuals who were in (opposite-sex) relationships. The  
679 lockdown could have resulted in restrictions in physical interactions and romantic dates with  
680 their partners, and reduced the social support received, thus increasing their anxiety. Lastly,  
681 during the lockdown, it is likely that most adults would move closer to their families for  
682 support and to avoid loneliness (44), especially in a family-centric country such as India.  
683 However, for many sexual minorities moving in with their parents/relatives, to whom they  
684 were not out or who disapproved of their sexuality, could be challenging, increasing their risk  
685 of experiencing hostility during the lockdown. Previous studies have shown that parental  
686 support and familial environment play crucial roles in self-acceptance among sexual  
687 minorities (45,46). The lack of such familial and/or parental support could hinder self-  
688 acceptance among sexual minorities, see for instance, Anurag's narrative of how he could

689 accept his sexuality only after he moved out of his relatives' home. Moreover, moving away  
690 from his "safe space" to a place which brought memories of discomfort likely increased his  
691 anxiety. This could be true for several of the sexual minorities who had gone through  
692 interpersonal and familial conflict earlier.

693 Our quantitative findings also found that individuals at greater, versus lower, risk of the  
694 effects of Covid-19 showed higher levels of anxiety. A previous study suggested that patients  
695 with existing risk factors to Covid-19 such as cardiovascular disease (CVD) were more also  
696 more likely have *worse health outcomes* if infected(47). Irrespective of worse health  
697 outcomes, belonging to a group with increased risk of contracting Covid-19, which has no  
698 known cure and unpredictably causes mortality, could potentially induce additional stress and  
699 anxiety. This corroborates findings from previous studies suggesting a higher prevalence of  
700 stress among front-line health workers (48), elderly persons (49), and people living with HIV  
701 (50,51) during the global public health crisis. However, our qualitative findings are in  
702 contrast to this finding. Ashish (who was living with HIV) showed no added concern (or  
703 anxiety) due to the lockdown. One explanation for this could be that Ashish was among those  
704 who adopt optimism and, in combination with constant precaution, show stronger resilience  
705 to adverse situations. Findings from a previous study found that people living with HIV could  
706 develop resilience despite their physical and psychological challenges (52). In fact, our study  
707 found that optimism and resilience coping were negatively related to anxiety and depressive  
708 symptoms. Moreover, Ashish enjoyed spending time indoors, which likely reduced any  
709 frustration related to not being able to enjoy regular life, in addition to the lower likelihood of  
710 contracting Covid-19.

711 We did not find quantitative evidence supporting the hypothesis that living in a state with a  
712 higher count of Covid-19 cases predicted greater anxiety and depressive in Indian adults. This  
713 is in contrast to previous research in Australia which found that respondents living in areas



714 with a high number of influenza cases were at much greater risk of stress than those living in  
715 uninfected areas (53). However, our qualitative results supported our hypothesis. The lack of  
716 evidence in our quantitative findings could be because of the operationalization of the  
717 concept of area. Our study operationalized area-level risk at the state level. It is possible that  
718 anxiety was higher among people living in a neighborhood (and not the state) with higher  
719 number of Covid-19 cases. Also, in addition to just the count of Covid-19 in the  
720 neighborhood (or state) including the infection fatality rate in the operationalization could  
721 have given a reliable estimate of the influence of place.

722 Our quantitative findings suggest that a past history of depression or loneliness could increase  
723 anxiety and depressive symptoms during the lockdown. Our qualitative findings corroborate  
724 this. Tulika and Salma's narratives suggest that stress during lockdown could revive past  
725 trauma. Previous study findings also support this interpretation (54). Our qualitative and  
726 quantitative findings also suggested that increased depressive symptoms in this group could  
727 also increase their Internet consumption leading to Internet addiction during the lockdown.  
728 Depressed individuals could use the Internet as way to cope with their negative psychological  
729 state during the lockdown, which risks addiction during a restrictive state such as a lockdown  
730 and could affect their quality of life even after the lockdown.

731 Anxiety and depressive symptoms during lockdown were found to predict disruptions in  
732 sleep and food schedules, corroborating findings from a previous study (55). Qualitative data  
733 found that an increase in anxiety and a lack of motivation to lead a routine life increased the  
734 risk of an unbalanced sleep cycle, which also impacted food consumption and its timings.  
735 Additionally, the inaccessibility to quality food due to the restrictions in physical mobility  
736 during the lockdown could affect the balanced diet among Indian adults. Beyond any  
737 immediate health effects which could further worsen mental health, such prolonged changes

738 in timing and consumption of food could impact their overall food eating patterns even after  
739 the lockdown, resulting in poorer physical and mental health in the longer term as well.

740 Our quantitative findings suggest that sharing about stress with loved ones and an increase in  
741 frequency of interacting with family members likely strengthened social bonds and also  
742 increased social empathy among Indian adults. Our qualitative findings elucidate this.

743 Tulika's narrative highlighted that the universal vulnerability due to the global pandemic and  
744 her sharing about it with others in a similar situation improved her connectedness with the  
745 people thereby strengthening her social relationships. Similarly, interacting and knowing the  
746 vulnerability of Rajan's parents (more vulnerable) made him more empathetic, and increase  
747 his connection with the society at large. This fits with the findings from a previous study that  
748 highlighted this argument--sharing and expressing emotions (and vulnerabilities) could make  
749 people more empathetic (56). Such increased social empathy could also be a positive  
750 response to the pandemic (and lockdown). For instance, a recent study from the West found  
751 that higher empathy towards the more vulnerable could induce motivation to maintain and  
752 promote social distancing (57).

### 753 **Limitations and strengths**

754 There are several limitations of this study that need to be noted while interpreting the results.

755 First, we used psychological scales to measure anxiety, depressive symptoms, Internet  
756 addiction, and pornography addiction, instead of clinical interviews which would have  
757 yielded medical diagnoses. However, our use of widely cited, reliable, and validated scales  
758 are informative, and could indicate symptoms of the psychological outcomes we explore.

759 Second, our recruitment through online media limited our sample to only those who use the  
760 Internet, which may have biased the sample towards the higher socioeconomic spectrum.

761 However, the lockdown prevented us from reaching people on the other side of the digital

762 divide. Third, our quantitative study included several shorter and single-item scales (such as  
763 the brief resilience coping scale). Longer scales could have yielded robust results. Because  
764 our pretest suggested that the length of the questionnaire was perceived as “a lot” we chose to  
765 use shorter scales. However, our qualitative findings align with our quantitative findings and  
766 unpack the complex processes explaining the psychological outcomes across diverse groups  
767 during the lockdown, thereby enhancing our confidence about the conclusions drawn. Lastly,  
768 the cross-sectional nature of the study limits our ability to make causal claims. Longitudinal  
769 studies with frequent follow-ups during the lockdown could have shed light on causal  
770 processes. However, we were grateful to be able to recruit a diverse sample for our  
771 quantitative and qualitative strands, which allowed us to explore the differences in the  
772 psychological outcomes during the lockdown across different groups in India.

773 Despite these limitations, our mixed methods findings highlight the additional psychological  
774 burden that the lockdown has brought to an invisible group, the sexual minorities. To our  
775 knowledge this is the first study to look at the differential psychological impact of the  
776 lockdown across different social groups (including sexual orientation) in India. Moreover,  
777 our use of qualitative narratives allowed us to understand the processes linking several social  
778 factors to the psychological outcomes in a nuanced manner. Our study also highlights a few  
779 positive aspects of the lockdown, underscoring the increase in social empathy and  
780 strengthened social bonds among Indian adults.

### 781 **Implications and conclusions**

782 Our findings echo Balagos’ argument that the marginalization of sexual minorities would be  
783 heightened during disasters, because existing inequalities are magnified at such times (58).  
784 While the Indian Supreme Court decriminalized homosexual acts in 2018, Indian policies are  
785 not yet inclusive of sexual minorities, who remain socially invisible. Our findings call for the

786 attention of counsellors and health professionals in understanding the specific psychological  
787 needs of the sexual minorities during such crises and providing services accordingly.

788 This study highlights the need for regular interaction and emotional support from friends,  
789 family, partners, and caregivers of sexual minorities, individuals with a history of depression  
790 or loneliness, a higher risk of contracting Covid-19. A recent study (59) highlighted the  
791 promise of delivering psychological support through online- and tele-counselling. This study  
792 warrants the use of such technologies in an inclusive manner. The study also opens avenues  
793 for researchers to further investigate the extent and nature of the psychological impact in such  
794 marginalized groups during crises or disasters.

795 Lastly, our study findings provide evidence for mental health policymakers to begin  
796 designing inclusive policies to address the concerns of marginalized groups during and in the  
797 aftermath of the Covid-19 global crisis.

798 All in all, our study highlights the differential psychological effect of the Covid-19 pandemic  
799 among sexual minorities, groups with history of depression, and those with high-risk of  
800 Covid-19. The study thereby urgently calls for the attention of policymakers to take sensitive  
801 and inclusive health decisions for the marginalized and the vulnerable, both during and after  
802 the crisis.

803

804 **Acknowledgement:** AJS and MAS thank Nilesh Thube (NVT) for his diligent contribution in  
805 data management and representation of results. AJS conveys special thanks to Dipankar  
806 Dutta for being extremely patient during the work. AJS and MAS thank Harvansh Dandelia,  
807 Rakshit Verma, and several other friends and colleagues who helped in the circulation of the  
808 online survey in a short time. AJS thanks his Bula da. AJS thanks all the participants for

809 filling up the form and sharing their emotions during this crisis. AJS was supported by  
810 fellowships by Department of Science and Technology, India and IIT Gandhinagar.

- 811 1. Statement on the second meeting of the International Health Regulations (2005) Emergency  
812 Committee regarding the outbreak of novel coronavirus (2019-nCoV) [Internet]. [cited 2020  
813 May 15]. Available from: [https://www.who.int/news-room/detail/30-01-2020-statement-on-](https://www.who.int/news-room/detail/30-01-2020-statement-on-the-second-meeting-of-the-international-health-regulations-(2005)-emergency-committee-regarding-the-outbreak-of-novel-coronavirus-(2019-ncov))  
814 [the-second-meeting-of-the-international-health-regulations-\(2005\)-emergency-committee-](https://www.who.int/news-room/detail/30-01-2020-statement-on-the-second-meeting-of-the-international-health-regulations-(2005)-emergency-committee-regarding-the-outbreak-of-novel-coronavirus-(2019-ncov))  
815 [regarding-the-outbreak-of-novel-coronavirus-\(2019-ncov\)](https://www.who.int/news-room/detail/30-01-2020-statement-on-the-second-meeting-of-the-international-health-regulations-(2005)-emergency-committee-regarding-the-outbreak-of-novel-coronavirus-(2019-ncov))
- 816 2. Coronavirus disease 2019 [Internet]. [cited 2020 May 15]. Available from:  
817 <https://www.who.int/emergencies/diseases/novel-coronavirus-2019>
- 818 3. Song P, Karako T. COVID-19: Real-time dissemination of scientific information to fight a public  
819 health emergency of international concern. *BioScience Trends*. 2020;
- 820 4. India coronavirus lockdown | Day 1 updates March 25, 2020 - The Hindu [Internet]. [cited  
821 2020 May 15]. Available from: [https://www.thehindu.com/news/national/india-coronavirus-](https://www.thehindu.com/news/national/india-coronavirus-lockdown-day-1-updates-march-25-2020/article31159466.ece)  
822 [lockdown-day-1-updates-march-25-2020/article31159466.ece](https://www.thehindu.com/news/national/india-coronavirus-lockdown-day-1-updates-march-25-2020/article31159466.ece)
- 823 5. Braunack-Mayer A, Toohar R, Collins JE, Street JM, Marshall H. Understanding the school  
824 community's response to school closures during the H1N1 2009 influenza pandemic. *BMC*  
825 *Public Health*. 2013.
- 826 6. Blendon RJ, Benson JM, DesRoches CM, Raleigh E, Taylor-Clark K. The Public's Response to  
827 Severe Acute Respiratory Syndrome in Toronto and the United States. *Clinical Infectious*  
828 *Diseases*. 2004;
- 829 7. Hawryluck L, Gold WL, Robinson S, Pogorski S, Galea S, Styra R. SARS control and  
830 psychological effects of quarantine, Toronto, Canada. *Emerging Infectious Diseases*. 2004;
- 831 8. Marjanovic Z, Greenglass ER, Coffey S. The relevance of psychosocial variables and working  
832 conditions in predicting nurses' coping strategies during the SARS crisis: An online  
833 questionnaire survey. *International Journal of Nursing Studies*. 2007;
- 834 9. Gautam R, Sharma M. 2019-nCoV pandemic: A disruptive and stressful atmosphere for Indian  
835 academic fraternity. *Brain, Behavior, and Immunity*. 2020.
- 836 10. Meyer IH. Prejudice, Social Stress, and Mental Health in Lesbian, Gay, and Bisexual  
837 Populations: Conceptual Issues and Research Evidence. Vol. 129, *Psychological Bulletin*. 2003.
- 838 11. Perry SL. Pornography Use and Depressive Symptoms: Examining the Role of Moral  
839 Incongruence. *Society and Mental Health*. 2018;
- 840 12. Grubbs JB, Volk F, Exline JJ, Pargament KI. Internet pornography use: Perceived addiction,  
841 psychological distress, and the validation of a brief measure. *Journal of Sex and Marital*  
842 *Therapy*. 2015;
- 843 13. Lai J, Ma S, Wang Y, Cai Z, Hu J, Wei N, et al. Factors Associated With Mental Health  
844 Outcomes Among Health Care Workers Exposed to Coronavirus Disease 2019. *JAMA network*  
845 *open*. 2020;

- 846 14. Taylor MR, Agho KE, Stevens GJ, Raphael B. Factors influencing psychological distress during  
847 a disease epidemic: Data from Australia's first outbreak of equine influenza. *BMC Public*  
848 *Health*. 2008;
- 849 15. Kang HJ, Bae KY, Kim SW, Shin HY, Shin IS, Yoon JS, et al. Impact of anxiety and depression on  
850 physical health condition and disability in an elderly Korean population. *Psychiatry*  
851 *Investigation*. 2017;
- 852 16. Nutt DJ, Wilson S, Paterson L. Sleep disorders as core symptoms of depression. *Dialogues in*  
853 *Clinical Neuroscience*. 2008;
- 854 17. Peterson RE, Latendresse SJ, Bartholome LT, Warren CS, Raymond NC. Binge eating disorder  
855 mediates links between symptoms of depression, anxiety, and caloric intake in overweight  
856 and obese women. *Journal of Obesity*. 2012;
- 857 18. Vanita R. *Queering india: Same-sex love and eroticism in indian culture and society. Queering*  
858 *India: Same-Sex Love and Eroticism in Indian Culture and Society*. 2013.
- 859 19. Greenhaus JH, Collins KM, Shaw JD. The relation between work-family balance and quality of  
860 life. *Journal of Vocational Behavior*. 2003;
- 861 20. Sinclair VG, Wallston KA, Strachan E. Resilient Coping Moderates the Effect of Trauma  
862 Exposure on Depression. *Research in nursing & health*. 2016;
- 863 21. Conversano C, Rotondo A, Lensi E, della Vista O, Arpone F, Reda MA. Optimism and Its  
864 Impact on Mental and Physical Well-Being. *Clinical Practice & Epidemiology in Mental Health*.  
865 2010;
- 866 22. Wang H, Xia Q, Xiong Z, Li Z, Xiang W, Yuan Y, et al. The psychological distress and coping  
867 styles in the early stages of the 2019 coronavirus disease (COVID-19) epidemic in the general  
868 mainland Chinese population: a web-based survey. *medRxiv*. 2020;
- 869 23. Kazmi SSH, Hasan K, Talib S, Saxena S. COVID-19 and Lockdwon: A Study on the Impact on  
870 Mental Health. *SSRN Electronic Journal*. 2020;
- 871 24. Roy D, Tripathy S, Kar SK, Sharma N, Verma SK, Kaushal V. Study of knowledge, attitude,  
872 anxiety & perceived mental healthcare need in Indian population during COVID-19 pandemic.  
873 *Asian Journal of Psychiatry*. 2020 Jun 1;51:102083.
- 874 25. Cresswell JW. *A Framework for Design: Qualitative, Quantitative, and mixed Methods*  
875 *Approaches*. Research Design. 1994.
- 876 26. Creswell JW, Plano Clark VL. *Designing and Conducting Mixed Methods Research* | SAGE  
877 Publications Ltd. SAGE Publications, Inc. 2017.
- 878 27. Spitzer RL, Kroenke K, Williams JBW, Löwe B. A brief measure for assessing generalized  
879 anxiety disorder: The GAD-7. *Archives of Internal Medicine*. 2006 May 22;166(10):1092–7.
- 880 28. Andresen EM, Malmgren JA, Carter WB, Patrick DL. Screening for depression in well older  
881 adults: Evaluation of a short form of the CES-D. *American Journal of Preventive Medicine*.  
882 1994;
- 883 29. Siddiqui OI. Methods for Computing Missing Item Response in Psychometric Scale  
884 Construction. *American Journal of Biostatistics*. 2015;

- 885 30. Hawthorne G, Hawthorne G, Elliott P. Imputing Cross-Sectional Missing Data: Comparison of  
886 Common Techniques. *Australian & New Zealand Journal of Psychiatry* [Internet]. 2005 Jul 26  
887 [cited 2020 May 18];39(7):583–90. Available from:  
888 <http://journals.sagepub.com/doi/10.1080/j.1440-1614.2005.01630.x>
- 889 31. Young KS. Internet addiction: The emergence of a new clinical disorder. *Cyberpsychology and*  
890 *Behavior*. 1998;
- 891 32. Noor SW, Rosser BRS, Erickson DJ. A Brief Scale to Measure Problematic Sexually Explicit  
892 Media Consumption: Psychometric Properties of the Compulsive Pornography Consumption  
893 (CPC) Scale Among Men Who Have Sex With Men. *Sexual Addiction and Compulsivity*. 2014;
- 894 33. Smith BW, Dalen J, Wiggins K, Tooley E, Christopher P, Bernard J. The brief resilience scale:  
895 Assessing the ability to bounce back. *International Journal of Behavioral Medicine*. 2008;
- 896 34. Scheier MF, Carver CS, Bridges MW. Distinguishing Optimism From Neuroticism (and Trait  
897 Anxiety, Self-Mastery, and Self-Esteem): A Reevaluation of the Life Orientation Test. *Journal*  
898 *of Personality and Social Psychology*. 1994;
- 899 35. MoHFW | Home [Internet]. [cited 2020 May 22]. Available from: <https://www.mohfw.gov.in/>
- 900 36. Curran PJ, West SG, Finch JF. The Robustness of Test Statistics to Nonnormality and  
901 Specification Error in Confirmatory Factor Analysis. *Psychological Methods*. 1996;
- 902 37. StataCorp. *Stata Statistical Software:Release 14*. Stata Statistical Software. 2015.
- 903 38. Braun V, Clarke V. Using thematic analysis in psychology. *Qualitative Research in Psychology*.  
904 2006;
- 905 39. Merriam SB. Case study research in education: A qualitative approach. *Telemedicine Journal*  
906 *and eHealth*. 1988.
- 907 40. Burla L, Knierim B, Barth J, Liewald K, Duetz M, Abel T. From Text to Codings. *Nursing*  
908 *Research* [Internet]. 2008 Mar [cited 2020 May 22];57(2):113–7. Available from:  
909 <http://journals.lww.com/00006199-200803000-00007>
- 910 41. Birt L, Scott S, Cavers D, Campbell C, Walter F. Member Checking: A Tool to Enhance  
911 Trustworthiness or Merely a Nod to Validation? *Qualitative Health Research*. 2016 Nov  
912 1;26(13):1802–11.
- 913 42. Ross LE, Salway T, Tarasoff LA, MacKay JM, Hawkins BW, Fehr CP. Prevalence of Depression  
914 and Anxiety Among Bisexual People Compared to Gay, Lesbian, and Heterosexual  
915 Individuals:A Systematic Review and Meta-Analysis. Vol. 55, *Journal of Sex Research*.  
916 Routledge; 2018. p. 435–56.
- 917 43. Nesmith AA, Burton DL, Cosgrove TJ. Gay, lesbian, and bisexual youth and young adults:  
918 Social support in their own words. *Journal of Homosexuality*. 1999;
- 919 44. Coronavirus drives some millennials home to their parents - Vox [Internet]. [cited 2020 May  
920 21]. Available from: [https://www.vox.com/the-goods/2020/3/26/21193038/millennials-](https://www.vox.com/the-goods/2020/3/26/21193038/millennials-moving-home-coronavirus-pandemic)  
921 [moving-home-coronavirus-pandemic](https://www.vox.com/the-goods/2020/3/26/21193038/millennials-moving-home-coronavirus-pandemic)

- 922 45. Darby-Mullins P, Murdock TB. The influence of family environment factors on self-  
923 acceptance and emotional adjustment among gay, lesbian, and bisexual adolescents. *Journal*  
924 *of GLBT Family Studies*. 2007;3(1):75–91.
- 925 46. D’amico E, Julien D, Tremblay N, Chartrand E. Gay, lesbian, and bisexual youths coming out  
926 to their parents: Parental reactions and youths’ outcomes. *Journal of GLBT Family Studies*.  
927 2015 Oct 20;11(5):411–37.
- 928 47. Bansal M. Cardiovascular disease and COVID-19. *Diabetes and Metabolic Syndrome: Clinical*  
929 *Research and Reviews*. 2020;
- 930 48. Lai J, Ma S, Wang Y, Cai Z, Hu J, Wei N, et al. Factors Associated With Mental Health  
931 Outcomes Among Health Care Workers Exposed to Coronavirus Disease 2019. *JAMA network*  
932 *open*. 2020 Mar 2;3(3):e203976.
- 933 49. Moen P, Chermack K. Imported from  
934 <https://academic.oup.com/psychsocgerontology/article/68/4/540/569189>. *The Journals of*  
935 *Gerontology: Series B* [Internet]. 2005 [cited 2020 May 21];60(Special\_Issue\_2):S99–108.  
936 Available from: <https://academic.oup.com/psychsocgerontology/article/68/4/540/569189>
- 937 50. Marziali ME, Card KG, Mclinden · Taylor, Wang · Lu, Trigg J, Hogg RS. Physical Distancing in  
938 COVID-19 May Exacerbate Experiences of Social Isolation among People Living with HIV. *AIDS*  
939 *and Behavior* [Internet]. [cited 2020 May 21];1:3. Available from:  
940 <https://doi.org/10.1007/s10461-020-02872-8>
- 941 51. Algarin AB, Varas-Rodríguez E, Valdivia C, Fennie KP, Larkey L, Hu N, et al. NOTES FROM THE  
942 FIELD Symptoms, Stress, and HIV-Related Care Among Older People Living with HIV During  
943 the COVID-19 Pandemic, Miami, Florida. *AIDS and Behavior* [Internet]. [cited 2020 May  
944 21];1:3. Available from: <https://doi.org/10.1007/s10461-020-02869-3>
- 945 52. de Santis JP, Florom-Smith A, Vermeesch A, Barroso S, DeLeon DA. Motivation, Management,  
946 and Mastery. *Journal of the American Psychiatric Nurses Association* [Internet]. 2013 Jan 7  
947 [cited 2020 May 21];19(1):36–46. Available from:  
948 <http://journals.sagepub.com/doi/10.1177/1078390312474096>
- 949 53. Taylor MR, Agho KE, Stevens GJ, Raphael B. Factors influencing psychological distress during  
950 a disease epidemic: Data from Australia’s first outbreak of equine influenza. *BMC Public*  
951 *Health*. 2008;8:347.
- 952 54. Burcusa SL, Iacono WG. Risk for recurrence in depression. Vol. 27, *Clinical Psychology Review*.  
953 NIH Public Access; 2007. p. 959–85.
- 954 55. Staner L. Sleep and anxiety disorders. *Dialogues in Clinical Neuroscience*. 2003;5(3):249–58.
- 955 56. Stanley S, Mettilda Buvanewari G, Meenakshi A. Predictors of empathy in women social  
956 workers. *Journal of Social Work* [Internet]. 2020 Jan 19 [cited 2020 May 22];20(1):43–63.  
957 Available from: <http://journals.sagepub.com/doi/10.1177/1468017318794280>
- 958 57. Pfattheicher S, Nockur L, Böhm R, Sassenrath C, Petersen MB. The emotional path to action:  
959 Empathy promotes physical distancing during the COVID-19 pandemic.
- 960 58. Balgos B, Gaillard JC, Sanz K. The warias of Indonesia in disaster risk reduction: the case of  
961 the 2010 Mt Merapi eruption in Indonesia. *Gender and Development*. 2012;



962 59. Figueroa CA, Aguilera A. The need for a mental health technology revolution in the COVID-19  
963 pandemic. *Frontiers in Psychiatry*. 2020;11:523.

964

965
